# Supplementary material for: The role of excitons within the hole transporting layer in quantum dot light emitting device degradation
Source: Royal Society of Chemistry journal article supplement (doi:10.1039/c8nr09560d), 2019-01-01
Supplement: c8nr09560d1.pdf [file c8nr09560d1.pdf]

## Electronic Supplementary Information

### The Role of Excitons Within the Hole Transporting Layer in Quantum Dot Light Emitting Device Degradation

Tyler Davidson-Hall\* and Hany Aziz

Department of Electrical and Computer Engineering and Waterloo Institute for Nanotechnology, University of Waterloo, 200 University Avenue West, Waterloo, Ontario N2L 3G1, Canada

Email: [tadavids@uwaterloo.ca](mailto:tadavids@uwaterloo.ca)

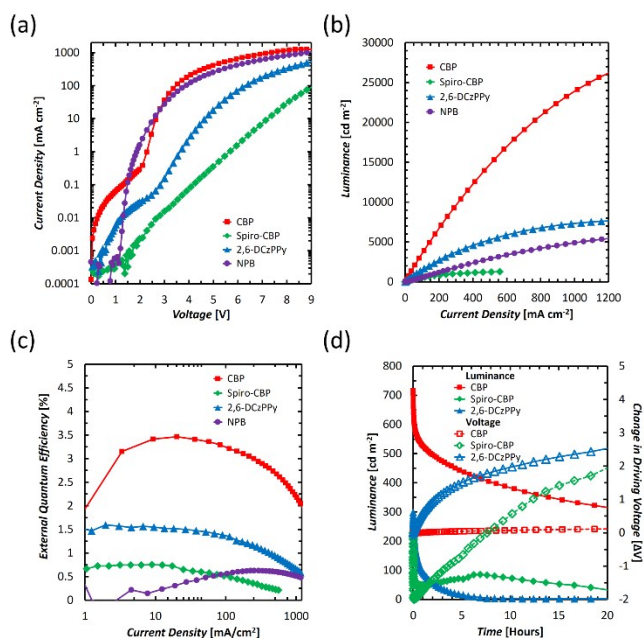

**Fig. S1.** (a) Current density vs voltage, (b) Luminance vs current density, (c) EQE vs current density, (d) Luminance (solid) and change in driving voltage ( $\Delta V = V(t) - V_0$ ) (dashed) electroluminescence lifetime curves for QDLEDs with CBP (red square), Spiro-CBP (green diamond), 2,6-DCzPPy (blue triangle), and NPB (purple circle) HTM layers.

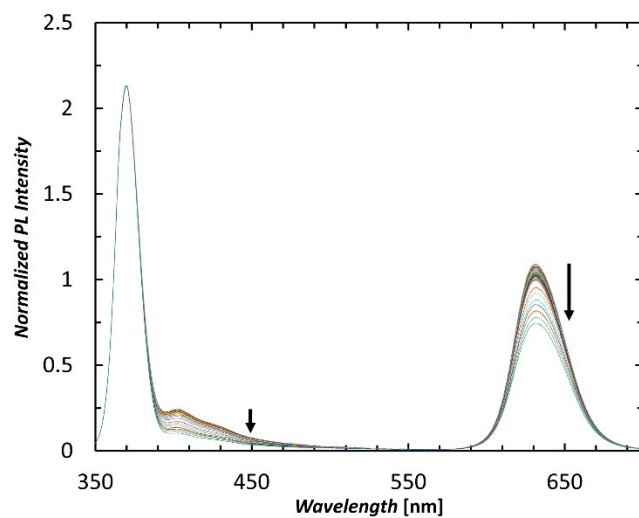

**Fig. S2.** Photoluminescence spectra for a QDLED with a Spiro-CBP HTM layer over 80 hours of constant UV irradiation

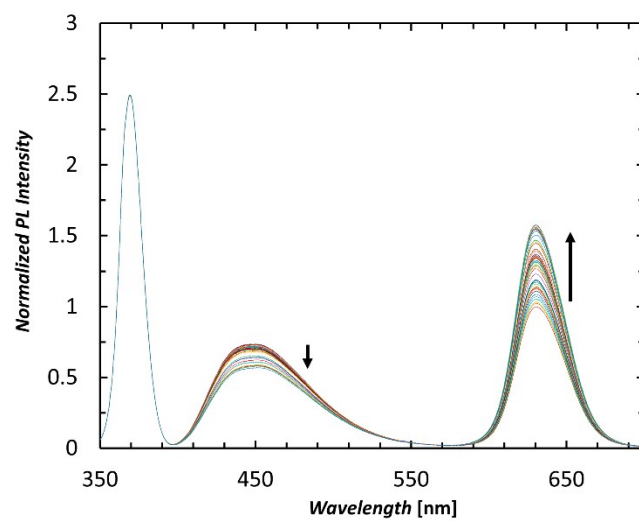

**Fig. S3.** Photoluminescence spectra for a QDLED with a NPB HTM layer over 80 hours of constant UV irradiation

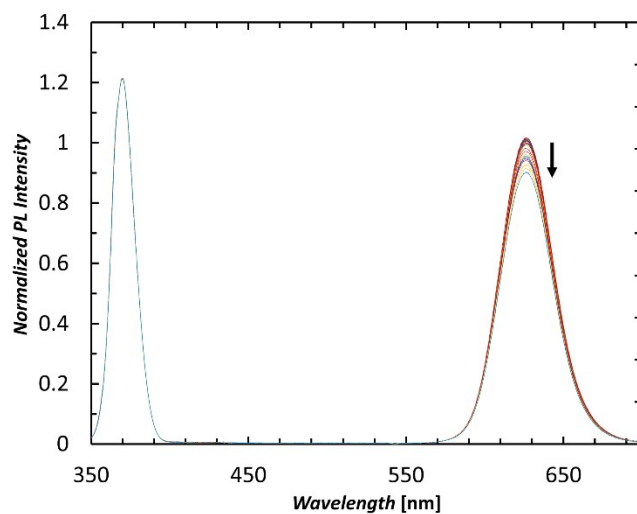

**Fig. S4.** Photoluminescence spectra for a QDLED with a 2,6-DCzPPy HTM layer over 80 hours of constant UV irradiation

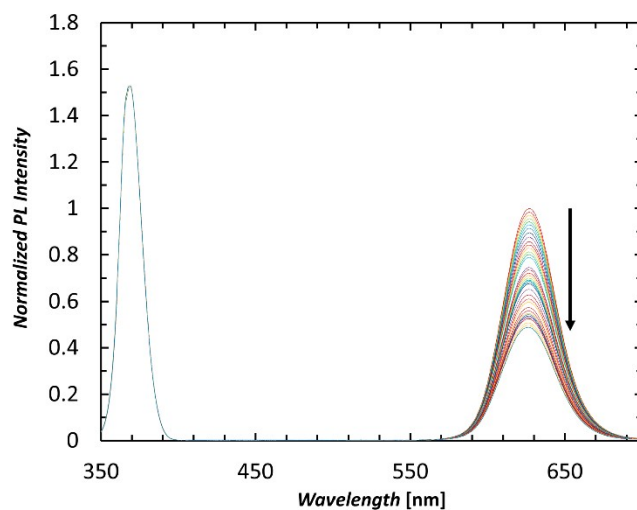

**Fig. S5.** Photoluminescence spectra for a QDLED with a mCP HTM layer over 80 hours of constant UV irradiation

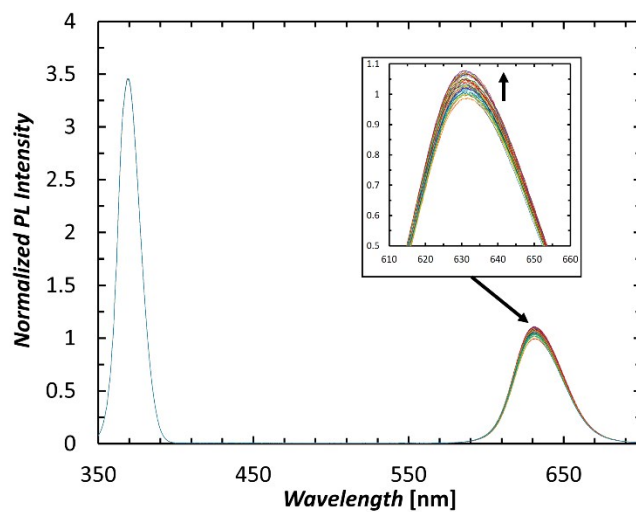

**Fig. S6.** Photoluminescence spectra for a QDLED with a TPBi spacer layer over 80 hours of constant UV irradiation

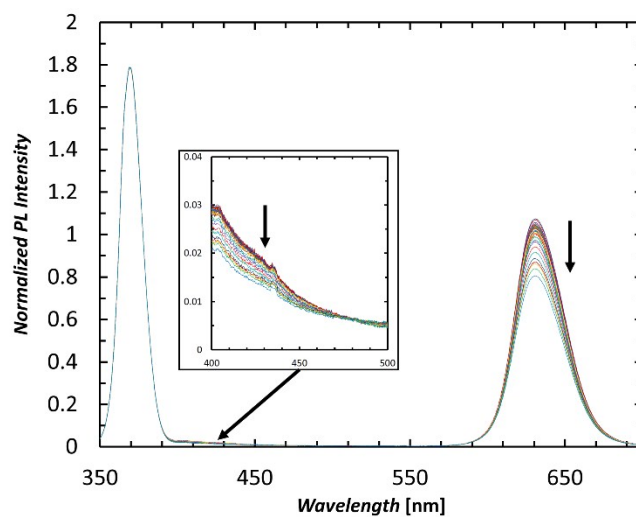

**Fig. S7.** Photoluminescence spectra for a QDLED with a Spiro-CBP/TPBi HTM layer over 80 hours of constant UV irradiation

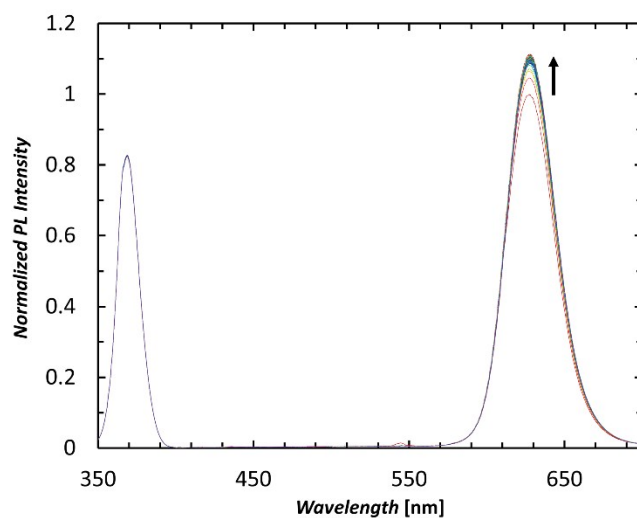

**Fig. S8.** Photoluminescence spectra for a QD film over 80 hours of constant UV irradiation

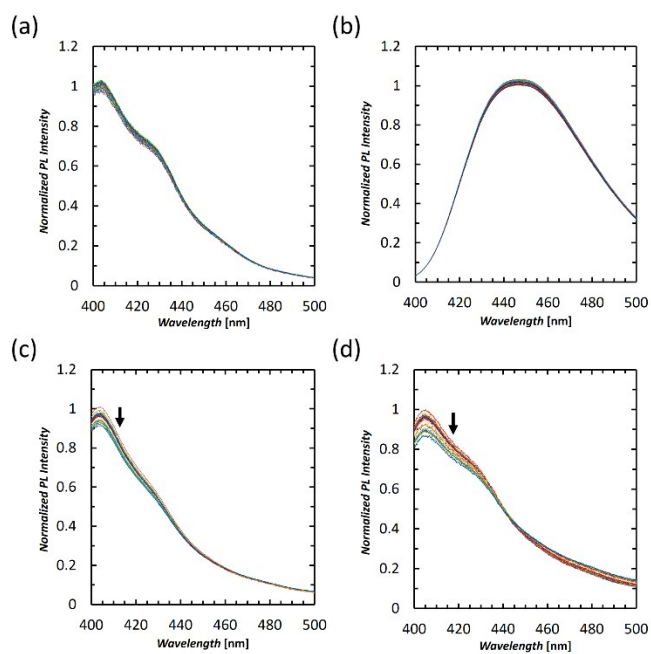

**Fig. S9.** Photoluminescence spectra for films of (a) CBP, (b) NPB, (c) Spiro-CBP, and (d) Spiro-CBP/TPBi over 80 hours of constant UV irradiation
